# Supplementary material
Source: Copernicus journal article supplement (doi:10.5194/bg-23-2431-2026)
Supplement: Supplementary file 1 [file bg-23-2431-2026-supplement.pdf]

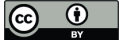

*Supplement of*

## **Temporary waterlogging alters CO<sub>2</sub> flux dynamics but not cumulative emissions in cultivated mineral soils**

**Reija Kronberg et al.**

*Correspondence to:* Reija Kronberg (reija.kronberg@helsinki.fi) and Mari Pihlatie (mari.pihlatie@helsinki.fi)

The copyright of individual parts of the supplement might differ from the article licence.

## Results of the statistical analyses

**Table S1.** The summary statistics from the linear mixed effects model on the effect of soil type, and plant and water treatment on CO<sub>2</sub> fluxes (g CO<sub>2</sub>-C m<sup>-2</sup> d<sup>-1</sup>) during and after waterlogging (n=4). Statistically significant terms are marked with asterisk. CI denotes confidence intervals (95%).

| Timeperiod | Cycle | Coefficient         | Value | 95% CI       | Std Error | z-value | p-value |
|------------|-------|---------------------|-------|--------------|-----------|---------|---------|
| During WL  | 2     | Intercept           | 0.98  | 0.77, 1.18   | 0.11      | 9.19    | 0.000*  |
|            |       | Soil - Sandy loam   | -0.13 | -0.27, 0.01  | 0.07      | -1.88   | 0.060   |
|            |       | Water - Saturation  | -0.38 | -0.52, -0.24 | 0.07      | -5.47   | 0.000*  |
|            |       | Plant - Cover crop  | 0.18  | 0.04, 0.32   | 0.07      | 2.59    | 0.009*  |
|            | 3     | Intercept           | 0.62  | 0.34, 0.90   | 0.14      | 4.35    | 0.000*  |
|            |       | Soil - Sandy loam   | -0.04 | -0.21, 0.13  | 0.09      | -0.45   | 0.652   |
|            |       | Water - Saturation  | -0.27 | -0.44, -0.10 | 0.09      | -3.06   | 0.002*  |
|            |       | Plant - CC          | 0.87  | 0.69, 1.04   | 0.09      | 9.88    | 0.000*  |
| After WL   | 2     | Intercept           | 1.36  | 0.90, 1.81   | 0.23      | 5.86    | 0.000*  |
|            |       | Soil - Sandy loam   | -0.07 | -0.34, 0.20  | 0.14      | -0.50   | 0.619   |
|            |       | Water - Saturation  | 0.76  | 0.49, 1.03   | 0.14      | 5.53    | 0.000*  |
|            |       | Plant - Cover crop  | 0.86  | 0.59, 1.12   | 0.14      | 6.23    | 0.000*  |
|            | 3     | Intercept           | 0.74  | 0.41, 1.07   | 0.17      | 4.36    | 0.000*  |
|            |       | Soil - Sandy loam   | 0.18  | 0.03, 0.33   | 0.08      | 2.29    | 0.022*  |
|            |       | Water - Saturation  | 0.40  | 0.18, 0.61   | 0.11      | 3.58    | 0.000*  |
|            |       | Plant - Cover crop  | 0.32  | 0.10, 0.54   | 0.11      | 2.89    | 0.004*  |
|            |       | Water Sat.:Plant CC | 0.33  | 0.02, 0.63   | 0.16      | 2.09    | 0.037*  |

<sup>a</sup>WL=Waterlogging

**Table S2.** The summary statistics from the post-hoc tests on mean cumulative CO<sub>2</sub> fluxes (g CO<sub>2</sub>-C m<sup>-2</sup> d<sup>-1</sup>) by study cycle and soil type. Statistically significant terms are marked with asterisk.

| Cycle | Soil       | Contrast            | Estimate | SE    | df | t-ratio | p-value |
|-------|------------|---------------------|----------|-------|----|---------|---------|
| 2     | Silty clay | FC NoCC - Sat NoCC  | -1.88    | 15.03 | 24 | -0.12   | 0.999   |
|       |            | FC NoCC - FC CC     | -37.33   | 15.03 | 24 | -2.48   | 0.088   |
|       |            | FC NoCC - Sat CC    | -45.87   | 15.03 | 24 | -3.05   | 0.026*  |
|       |            | Sat NoCC - FC CC    | -35.45   | 15.03 | 24 | -2.36   | 0.113   |
|       |            | Sat NoCC - Sat CC   | -43.99   | 15.03 | 24 | -2.93   | 0.035*  |
|       |            | FC CC - Sat CC      | -8.54    | 15.03 | 24 | -0.57   | 0.941   |
|       | Sandy loam | FC NoCC - Sat NoCC  | -1.67    | 15.03 | 24 | -0.11   | 0.999   |
|       |            | FC NoCC - FC CC     | -38.42   | 15.03 | 24 | -2.56   | 0.076   |
|       |            | FC NoCC - Sat CC    | -38.51   | 15.03 | 24 | -2.56   | 0.075   |
|       |            | Sat NoCC - FC CC    | -36.76   | 15.03 | 24 | -2.44   | 0.095   |
|       |            | Sat NoCC - Sat CC   | -36.84   | 15.03 | 24 | -2.45   | 0.094   |
|       |            | FC CC - Sat CC      | -0.08    | 15.03 | 24 | -0.01   | 1.000   |
| 3     | Silty clay | FC NoCC - Sat NoCC  | 14.58    | 11.33 | 24 | 1.29    | 0.580   |
|       |            | FC NoCC - FC CC     | -46.02   | 11.33 | 24 | -4.06   | 0.002*  |
|       |            | FC NoCC - Sat CC    | -50.75   | 11.33 | 24 | -4.48   | 0.001*  |
|       |            | Sat NoCC - FC CC    | -60.60   | 11.33 | 24 | -5.35   | 0.000*  |
|       |            | Sat NoCC - Sat CC   | -65.33   | 11.33 | 24 | -5.77   | 0.000*  |
|       |            | FC CC - Sat CC      | -4.73    | 11.33 | 24 | -0.42   | 0.975   |
|       | Sandy loam | FC NoCC - Sat No CC | 6.13     | 11.33 | 24 | 0.54    | 0.948   |
|       |            | FC NoCC - FC CC     | -54.04   | 11.33 | 24 | -4.77   | 0.000*  |
|       |            | FC NoCC - Sat CC    | -46.44   | 11.33 | 24 | -4.10   | 0.002*  |
|       |            | Sat NoCC - FC CC    | -60.17   | 11.33 | 24 | -5.31   | 0.000*  |
|       |            | Sat NoCC - Sat CC   | -52.57   | 11.33 | 24 | -4.64   | 0.001*  |
|       |            | FC CC - Sat CC      | 7.61     | 11.33 | 24 | 0.67    | 0.907   |

**Table S3.** The summary statistics of the pairwise t-test used to test the statistical difference between the cumulative CO<sub>2</sub> efflux calculated with measured vs. modelled CO<sub>2</sub> fluxes (g CO<sub>2</sub>-C m<sup>-2</sup>). Statistically significant differences are marked with asterisk.

| Cycle   | Soil       | Treatment | Group 1  | Group 2  | n | p-value |
|---------|------------|-----------|----------|----------|---|---------|
| Cycle 2 | Silty clay | CC-FC     | Measured | Modelled | 3 | 0.493   |
|         |            | CC-Sat    | Measured | Modelled | 3 | 0.352   |
|         |            | No CC-FC  | Measured | Modelled | 3 | 0.852   |
|         |            | No CC-Sat | Measured | Modelled | 3 | 0.291   |
|         | Sandy loam | CC-FC     | Measured | Modelled | 3 | 0.977   |
|         |            | CC-Sat    | Measured | Modelled | 3 | 0.396   |
|         |            | No CC-FC  | Measured | Modelled | 3 | 0.63    |
|         |            | No CC-Sat | Measured | Modelled | 3 | 0.739   |
| Cycle 3 | Silty clay | CC-FC     | Measured | Modelled | 3 | 0.532   |
|         |            | CC-Sat    | Measured | Modelled | 3 | 0.711   |
|         |            | No CC-FC  | Measured | Modelled | 3 | 0.022*  |
|         |            | No CC-Sat | Measured | Modelled | 3 | 0.015*  |
|         | Sandy loam | CC-FC     | Measured | Modelled | 3 | 0.994   |
|         |            | CC-Sat    | Measured | Modelled | 3 | 0.831   |
|         |            | No CC-FC  | Measured | Modelled | 3 | 0.001*  |
|         |            | No CC-Sat | Measured | Modelled | 3 | 0.001*  |

**Table S4.** The summary statistics from the linear mixed effects model on the total dissolved C (TDC) content in soil (mg C l<sup>-1</sup> soil). Statistically significant differences are marked with asterisk. CI denotes confidence intervals.

| C species | Cycle | Coefficient                             | Value  | Std. Error | 95% CI        | DF  | t-value | p-value |
|-----------|-------|-----------------------------------------|--------|------------|---------------|-----|---------|---------|
| TDC       | 2     | (Intercept)                             | 14.13  | 2.55       | 9.09, 19.16   | 138 | 5.55    | 0.000*  |
|           |       | Days                                    | 0.33   | 0.04       | 0.24, 0.41    | 138 | 7.52    | 0.000*  |
|           |       | Depth_30                                | 2.78   | 2.18       | -1.54, 7.10   | 138 | 1.27    | 0.205   |
|           |       | Depth_50                                | 1.05   | 2.16       | -3.22, 5.32   | 138 | 0.49    | 0.627   |
|           |       | SoilSandy loam                          | -10.13 | 3.46       | -18.11, -2.14 | 8   | -2.92   | 0.019*  |
|           |       | PlantCover crop                         | 9.97   | 3.06       | 2.93, 17.02   | 8   | 3.26    | 0.011*  |
|           |       | Days:SoilSandy loam                     | -0.25  | 0.06       | -0.36, -0.14  | 138 | -4.38   | 0.000*  |
|           |       | SoilSandy loam:PlantCover crop          | -7.33  | 4.30       | -17.24, 2.59  | 8   | -1.70   | 0.127   |
|           |       | Days:Depth_30                           | -0.18  | 0.06       | -0.29, -0.06  | 138 | -3.10   | 0.002*  |
|           |       | Days:Depth_50                           | -0.33  | 0.06       | -0.45, -0.22  | 138 | -5.88   | 0.000*  |
|           |       | Depth_30:SoilSandy loam                 | 1.42   | 3.04       | -4.60, 7.43   | 138 | 0.47    | 0.642   |
|           |       | Depth_50:SoilSandy loam                 | 5.75   | 2.88       | 0.06, 11.44   | 138 | 2.00    | 0.047*  |
|           |       | Depth_30:PlantCover crop                | -7.60  | 1.87       | -11.31, -3.90 | 138 | -4.06   | 0.000*  |
|           |       | Depth_50:PlantCover crop                | -2.42  | 1.88       | -6.13, 1.29   | 138 | -1.29   | 0.199   |
|           |       | Days:Depth_30:SoilSandy loam            | 0.19   | 0.08       | 0.03, 0.35    | 138 | 2.32    | 0.022*  |
|           |       | Days:Depth_50:SoilSandy loam            | 0.30   | 0.08       | 0.15, 0.46    | 138 | 3.90    | 0.000*  |
|           |       | Depth_30:SoilSandy loam:PlantCover crop | 9.96   | 2.64       | 4.74, 15.19   | 138 | 3.77    | 0.000*  |
|           |       | Depth_50:SoilSandy loam:PlantCover crop | 1.93   | 2.64       | -3.28, 7.15   | 138 | 0.73    | 0.464   |
|           | 3     | (Intercept)                             | 18.62  | 2.17       | 14.32, 22.92  | 117 | 8.58    | 0.000*  |
|           |       | Days                                    | 0.37   | 0.04       | 0.29, 0.45    | 117 | 8.83    | 0.000*  |
|           |       | SoilSandy loam                          | -13.23 | 3.07       | -20.30, -6.15 | 8   | -4.31   | 0.003*  |
|           |       | PlantCover crop                         | 9.02   | 2.66       | 2.89, 15.16   | 8   | 3.39    | 0.009*  |
|           |       | Depth_30                                | -1.86  | 1.91       | -5.66, 1.93   | 117 | -0.97   | 0.332   |
|           |       | Depth_50                                | -7.53  | 1.95       | -11.38, -3.67 | 117 | -3.87   | 0.000*  |
|           |       | Days:SoilSandy loam                     | -0.17  | 0.06       | -0.29, -0.05  | 117 | -2.86   | 0.005*  |
|           |       | SoilSandy loam:PlantCover crop          | -7.00  | 3.76       | -15.67, 1.67  | 8   | -1.86   | 0.100*  |
|           |       | Days:Depth_30                           | -0.26  | 0.06       | -0.37, -0.14  | 117 | -4.30   | 0.000*  |
|           |       | Days:Depth_50                           | -0.33  | 0.06       | -0.45, -0.21  | 117 | -5.47   | 0.000*  |
|           |       | SoilSandy loam:Depth_30                 | 5.22   | 2.71       | -0.14, 10.58  | 117 | 1.93    | 0.056   |
|           |       | SoilSandy loam:Depth_50                 | 10.66  | 2.73       | 5.25, 16.07   | 117 | 3.90    | 0.000*  |
|           |       | PlantCover crop:Depth_30                | -6.10  | 1.63       | -9.31, -2.88  | 117 | -3.75   | 0.000*  |
|           |       | PlantCover crop:Depth_50                | -0.50  | 1.65       | -3.76, 2.76   | 117 | -0.30   | 0.761   |
|           |       | Days:SoilSandy loam:Depth_30            | 0.19   | 0.08       | 0.02, 0.36    | 117 | 2.25    | 0.026*  |
|           |       | Days:SoilSandy loam:Depth_50            | 0.15   | 0.09       | -0.02, 0.32   | 117 | 1.73    | 0.086   |
|           |       | SoilSandy loam:PlantCover crop:Depth_30 | 7.94   | 2.30       | 3.39, 12.50   | 117 | 3.46    | 0.001*  |
|           |       | SoilSandy loam:PlantCover crop:Depth_50 | 4.40   | 2.31       | -0.19, 8.98   | 117 | 1.90    | 0.060   |

**Table S5.** The summary statistics from the linear mixed effects model on the soil dissolved inorganic C (DIC) content mg C l<sup>-1</sup> soil). CI denotes lower and upper confidence intervals.

| C species                               | Cycle | Coefficient                             | Value | Std. Error      | 95% CI       | DF   | t-value      | p-value |       |        |
|-----------------------------------------|-------|-----------------------------------------|-------|-----------------|--------------|------|--------------|---------|-------|--------|
| DIC                                     | 2     | (Intercept)                             | 4.54  | 1.87            | 0.84, 8.24   | 137  | 2.43         | 0.017*  |       |        |
|                                         |       | Days                                    | 0.33  | 0.03            | 0.27, 0.38   | 137  | 11.25        | 0.000*  |       |        |
|                                         |       | Depth_f30                               | 2.04  | 1.37            | -0.66, 4.75  | 137  | 1.49         | 0.137   |       |        |
|                                         |       | Depth_f50                               | 5.28  | 1.35            | 2.61, 7.96   | 137  | 3.90         | 0.000*  |       |        |
|                                         |       | SoilSandy loam                          | -3.30 | 2.54            | -9.15, 2.54  | 8    | -1.30        | 0.229   |       |        |
|                                         |       | PlantCover crop                         | 6.50  | 2.40            | 0.95, 12.04  | 8    | 2.70         | 0.027*  |       |        |
|                                         |       | Days:SoilSandy loam                     | -0.25 | 0.04            | -0.32, -0.18 | 137  | -7.04        | 0.000*  |       |        |
|                                         |       | Days:PlantCover crop                    | 0.03  | 0.02            | -0.01, 0.07  | 137  | 1.64         | 0.103   |       |        |
|                                         |       | SoilSandy loam:PlantCover crop          | -5.18 | 3.27            | -12.73, 2.36 | 8    | -1.58        | 0.152   |       |        |
|                                         |       | Days:Depth_30                           | -0.21 | 0.04            | -0.28, -0.14 | 137  | -5.79        | 0.000*  |       |        |
|                                         |       | Days:Depth_50                           | -0.33 | 0.04            | -0.40, -0.26 | 137  | -9.37        | 0.000*  |       |        |
|                                         |       | Depth_30:SoilSandy loam                 | -1.73 | 1.91            | -5.50, 2.04  | 137  | -0.91        | 0.366   |       |        |
|                                         |       | Depth_50:SoilSandy loam                 | -2.82 | 1.80            | -6.39, 0.75  | 137  | -1.56        | 0.120   |       |        |
|                                         |       | Depth_30:PlantCover crop                | -4.02 | 1.18            | -6.34, -1.69 | 137  | -3.42        | 0.001*  |       |        |
|                                         |       | Depth_50:PlantCover crop                | 0.10  | 1.18            | -2.23, 2.42  | 137  | 0.08         | 0.934   |       |        |
|                                         |       | Days:Depth_30:SoilSandy loam            | 0.25  | 0.05            | 0.15, 0.35   | 137  | 4.94         | 0.000*  |       |        |
|                                         |       | Days:Depth_50:SoilSandy loam            | 0.29  | 0.05            | 0.19, 0.39   | 137  | 5.94         | 0.000*  |       |        |
|                                         |       | Depth_30:SoilSandy loam:PlantCover crop | 4.76  | 1.66            | 1.48, 8.04   | 137  | 2.87         | 0.005*  |       |        |
|                                         |       | Depth_50:SoilSandy loam:PlantCover crop | -1.85 | 1.65            | -5.12, 1.42  | 137  | -1.12        | 0.265   |       |        |
|                                         |       |                                         | 3     | (Intercept)     | 8.83         | 1.06 | 6.73, 10.93  | 114     | 8.32  | 0.000* |
|                                         |       |                                         |       | Days            | 0.36         | 0.03 | 0.30, 0.41   | 114     | 12.08 | 0.000* |
|                                         |       |                                         |       | SoilSandy loam  | -6.71        | 1.37 | -9.86, -3.56 | 8       | -4.91 | 0.001* |
|                                         |       |                                         |       | PlantCover crop | 3.16         | 1.37 | 0.01, 6.31   | 8       | 2.32  | 0.049* |
|                                         |       |                                         |       | Depth_30        | -2.37        | 1.26 | -4.87, 0.12  | 114     | -1.89 | 0.062  |
| Depth_50                                | -2.33 |                                         |       | 1.26            | -4.83, 0.17  | 114  | -1.85        | 0.067   |       |        |
| Days:SoilSandy loam                     | -0.21 |                                         |       | 0.03            | -0.28, -0.14 | 114  | -6.17        | 0.000*  |       |        |
| Days:PlantCover crop                    | 0.12  |                                         |       | 0.03            | 0.06, 0.19   | 114  | 3.67         | 0.000*  |       |        |
| SoilSandy loam:PlantCover crop          | -3.13 |                                         |       | 1.48            | -6.54, 0.29  | 8    | -2.11        | 0.068   |       |        |
| Days:Depth_30                           | -0.24 |                                         |       | 0.04            | -0.33, -0.16 | 114  | -5.84        | 0.000*  |       |        |
| Days:Depth_50                           | -0.31 |                                         |       | 0.04            | -0.39, -0.22 | 114  | -7.30        | 0.000*  |       |        |
| SoilSandy loam:Depth_30                 | 3.22  |                                         |       | 1.55            | 0.15, 6.29   | 114  | 2.08         | 0.040*  |       |        |
| SoilSandy loam:Depth_50                 | 2.29  |                                         |       | 1.56            | -0.80, 5.39  | 114  | 1.47         | 0.145   |       |        |
| PlantCover crop:Depth_30                | -1.84 |                                         |       | 1.55            | -4.91, 1.23  | 114  | -1.19        | 0.236   |       |        |
| PlantCover crop:Depth_50                | 3.24  |                                         |       | 1.55            | 0.17, 6.31   | 114  | 2.09         | 0.039*  |       |        |
| Days:SoilSandy loam:Depth_30            | 0.21  |                                         |       | 0.05            | 0.11, 0.31   | 114  | 4.36         | 0.000*  |       |        |
| Days:SoilSandy loam:Depth_50            | 0.21  |                                         |       | 0.05            | 0.11, 0.31   | 114  | 4.33         | 0.000*  |       |        |
| Days:PlantCover crop:Depth_30           | -0.09 |                                         |       | 0.05            | -0.19, 0.00  | 114  | -1.91        | 0.059   |       |        |
| Days:PlantCover crop:Depth_50           | -0.16 |                                         |       | 0.05            | -0.26, -0.07 | 114  | -3.33        | 0.001*  |       |        |
| SoilSandy loam:PlantCover crop:Depth_30 | 3.57  |                                         |       | 1.31            | 0.96, 6.17   | 114  | 2.71         | 0.008*  |       |        |
| SoilSandy loam:PlantCover crop:Depth_50 | -0.67 |                                         |       | 1.32            | -3.29, 1.96  | 114  | -0.50        | 0.615   |       |        |

**Table S6.** The summary statistics from the linear mixed effects model on the dissolved organic C (DOC) content in soil (mg C l<sup>-1</sup> soil). CI denotes confidence intervals.

| C species                               | Cycle                                   | Coefficient                             | Value       | Std. Error  | 95% CI       | DF     | t-value | p-value |
|-----------------------------------------|-----------------------------------------|-----------------------------------------|-------------|-------------|--------------|--------|---------|---------|
| DOC                                     | 2                                       | (Intercept)                             | 3.81        | 0.29        | 3.23, 4.40   | 143    | 12.95   | 0.000*  |
|                                         |                                         | SoilSandy loam                          | -2.47       | 0.39        | -3.36, -1.58 | 8      | -6.39   | 0.000*  |
|                                         |                                         | PlantCover crop                         | 0.54        | 0.39        | -0.37, 1.44  | 8      | 1.36    | 0.210   |
|                                         |                                         | Depth_f30                               | 0.47        | 0.26        | -0.05, 0.98  | 143    | 1.79    | 0.076   |
|                                         |                                         | Depth_f50                               | -1.42       | 0.26        | -1.93, -0.91 | 143    | -5.46   | 0.000*  |
|                                         |                                         | Days                                    | 0.00        | 0.00        | -0.01, 0.00  | 143    | -1.01   | 0.315   |
|                                         |                                         | SoilSandy loam:PlantCover crop          | -0.36       | 0.55        | -1.63, 0.90  | 8      | -0.66   | 0.526   |
|                                         |                                         | SoilSandy loam:Depth_30                 | 0.81        | 0.37        | 0.09, 1.53   | 143    | 2.22    | 0.028*  |
|                                         |                                         | SoilSandy loam:Depth_50                 | 3.31        | 0.36        | 2.60, 4.01   | 143    | 9.23    | 0.000*  |
|                                         |                                         | PlantCover crop:Depth_30                | -0.83       | 0.37        | -1.55, -0.10 | 143    | -2.25   | 0.026*  |
|                                         |                                         | PlantCover crop:Depth_50                | -0.49       | 0.37        | -1.22, 0.23  | 143    | -1.34   | 0.181   |
|                                         |                                         | SoilSandy loam:PlantCover crop:Depth_30 | 1.34        | 0.52        | 0.31, 2.36   | 143    | 2.58    | 0.011*  |
|                                         | SoilSandy loam:PlantCover crop:Depth_50 | 0.82                                    | 0.52        | -0.20, 1.84 | 143          | 1.58   | 0.116   |         |
|                                         | 3                                       | (Intercept)                             | 9.97        | 1.43        | 7.14, 12.80  | 121    | 6.97    | 0.000*  |
|                                         |                                         | Days                                    | 0.01        | 0.02        | -0.02, 0.04  | 121    | 0.52    | 0.601   |
|                                         |                                         | SoilSandy loam                          | -5.50       | 1.93        | -9.95, -1.05 | 8      | -2.85   | 0.021*  |
|                                         |                                         | PlantCover crop                         | 3.78        | 2.02        | -0.89, 8.44  | 8      | 1.87    | 0.099   |
|                                         |                                         | Depth_30                                | 0.20        | 0.79        | -1.36, 1.75  | 121    | 0.25    | 0.801   |
|                                         |                                         | Depth_50                                | -5.93       | 0.79        | -7.48, -4.37 | 121    | -7.55   | 0.000*  |
|                                         |                                         | Days:PlantCover crop                    | -0.04       | 0.02        | -0.09, 0.00  | 121    | -1.86   | 0.065   |
|                                         |                                         | SoilSandy loam:PlantCover crop          | -3.87       | 2.73        | -10.16, 2.42 | 8      | -1.42   | 0.193   |
|                                         |                                         | SoilSandy loam:Depth_30                 | 1.48        | 1.11        | -0.72, 3.68  | 121    | 1.33    | 0.186   |
| SoilSandy loam:Depth_50                 |                                         | 6.73                                    | 1.11        | 4.54, 8.93  | 121          | 6.06   | 0.000*  |         |
| PlantCover crop:Depth_30                | -1.89                                   | 1.11                                    | -4.09, 0.31 | 121         | -1.70        | 0.092  |         |         |
| PlantCover crop:Depth_50                | 0.33                                    | 1.12                                    | -1.89, 2.56 | 121         | 0.30         | 0.767  |         |         |
| SoilSandy loam:PlantCover crop:Depth_30 | 4.38                                    | 1.57                                    | 1.27, 7.49  | 121         | 2.79         | 0.006* |         |         |
| SoilSandy loam:PlantCover crop:Depth_50 | 5.17                                    | 1.58                                    | 2.04, 8.30  | 121         | 3.27         | 0.001* |         |         |

**Table S7.** The summary statistics from the linear model used to test the effects of treatments on total CO<sub>2</sub> production (g C m<sup>-2</sup>) during the waterlogging treatment.

| Cycle | Coefficient        | Estimate | SE   | t-value | p-value |
|-------|--------------------|----------|------|---------|---------|
| 2     | Intercept          | 52.40    | 4.03 | 13.01   | 0.000*  |
|       | Soil - Sandy loam  | -8.30    | 4.03 | -2.06   | 0.052   |
|       | Plant - CC         | 6.95     | 4.03 | 1.73    | 0.100   |
|       | Water - Saturation | -14.09   | 4.03 | -3.50   | 0.002*  |
| 3     | Intercept          | 23.46    | 4.28 | 5.48    | 0.000*  |
|       | Soil - Sandy loam  | -5.25    | 4.28 | -1.23   | 0.234   |
|       | Plant - CC         | 34.57    | 4.28 | 8.08    | 0.000*  |
|       | Water - Saturation | -7.44    | 4.28 | -1.74   | 0.098   |

**Table S8.** The summary statistics from the post-hoc tests comparing the mean CO<sub>2</sub> production (g C m<sup>-2</sup>) in the two water treatments (<FC, Saturation) during waterlogging by study cycle, soil type and plant treatment. Statistically significant differences are marked with asterisk.

| Cycle | Soil       | Plant | Estimate | SE   | df    | t-ratio | p-value |
|-------|------------|-------|----------|------|-------|---------|---------|
| 2     | Silty clay | No CC | 18.89    | 8.88 | 16.00 | 2.13    | 0.049*  |
|       |            | CC    | 13.85    | 8.88 | 16.00 | 1.56    | 0.138   |
|       | Sandy loam | No CC | 11.17    | 8.88 | 16.00 | 1.26    | 0.226   |
|       |            | CC    | 12.45    | 8.88 | 16.00 | 1.40    | 0.180   |
| 3     | Silty clay | No CC | 8.73     | 9.31 | 16.00 | 0.94    | 0.362   |
|       |            | CC    | 1.31     | 9.31 | 16.00 | 0.14    | 0.890   |
|       | Sandy loam | No CC | 6.93     | 9.31 | 16.00 | 0.75    | 0.467   |
|       |            | CC    | 12.78    | 9.31 | 16.00 | 1.37    | 0.189   |

**Table S9.** Summary statistics from the repeated measures correlation ( $r_{rm}$ ) analysis of porewater dissolved Fe and C concentrations ( $\mu\text{mol l}^{-1}$ ).

| Cycle | Soil       | C species | Plant         | Depth | $r_{rm}$ | 95% CI, low | 95% CI, high | df | p-value | Intercept | Slope   |
|-------|------------|-----------|---------------|-------|----------|-------------|--------------|----|---------|-----------|---------|
| 2     | Sandy loam | DOC       | No cover crop | 10 cm | 0.59     | 0.19        | 0.83         | 17 | 0.007   | 394.34    | 289.55  |
| 2     | Sandy loam | DOC       | No cover crop | 30 cm | 0.44     | 0.00        | 0.74         | 18 | 0.053   | 819.24    | 448.72  |
| 2     | Sandy loam | DOC       | No cover crop | 50 cm | 0.07     | -0.36       | 0.48         | 20 | 0.750   | 1704.48   | 76.37   |
| 2     | Sandy loam | DOC       | Cover crop    | 10 cm | 0.71     | 0.38        | 0.88         | 17 | 0.001   | 421.11    | 661.57  |
| 2     | Sandy loam | DOC       | Cover crop    | 30 cm | 0.34     | -0.12       | 0.68         | 18 | 0.140   | 1415.52   | 221.83  |
| 2     | Sandy loam | DOC       | Cover crop    | 50 cm | -0.19    | -0.60       | 0.31         | 16 | 0.460   | 2035.85   | -87.56  |
| 2     | Sandy loam | DIC       | No cover crop | 10 cm | -0.22    | -0.61       | 0.26         | 17 | 0.370   | 800.30    | -148.84 |
| 2     | Sandy loam | DIC       | No cover crop | 30 cm | 0.04     | -0.41       | 0.47         | 18 | 0.870   | 1041.61   | 41.41   |
| 2     | Sandy loam | DIC       | No cover crop | 50 cm | 0.18     | -0.26       | 0.56         | 20 | 0.420   | 1110.35   | 168.98  |
| 2     | Sandy loam | DIC       | Cover crop    | 10 cm | -0.22    | -0.61       | 0.26         | 17 | 0.360   | 1248.75   | -106.40 |
| 2     | Sandy loam | DIC       | Cover crop    | 30 cm | 0.32     | -0.15       | 0.67         | 18 | 0.170   | 1212.43   | 254.73  |
| 2     | Sandy loam | DIC       | Cover crop    | 50 cm | 0.53     | 0.09        | 0.8          | 16 | 0.022   | 888.44    | 576.24  |
| 2     | Sandy loam | TDC       | No cover crop | 10 cm | 0.2      | -0.28       | 0.6          | 17 | 0.410   | 1194.65   | 140.71  |
| 2     | Sandy loam | TDC       | No cover crop | 30 cm | 0.41     | -0.04       | 0.72         | 18 | 0.070   | 1860.86   | 490.12  |
| 2     | Sandy loam | TDC       | No cover crop | 50 cm | 0.21     | -0.24       | 0.58         | 20 | 0.360   | 2814.83   | 245.35  |
| 2     | Sandy loam | TDC       | Cover crop    | 10 cm | 0.58     | 0.17        | 0.82         | 17 | 0.009   | 1669.87   | 555.17  |
| 2     | Sandy loam | TDC       | Cover crop    | 30 cm | 0.59     | 0.19        | 0.82         | 18 | 0.007   | 2627.95   | 476.56  |
| 2     | Sandy loam | TDC       | Cover crop    | 50 cm | 0.42     | -0.06       | 0.74         | 16 | 0.086   | 2924.29   | 488.68  |
| 2     | Silty clay | DOC       | No cover crop | 10 cm | -0.3     | -0.66       | 0.18         | 17 | 0.220   | 1809.26   | -181.71 |
| 2     | Silty clay | DOC       | No cover crop | 30 cm | -0.22    | -0.60       | 0.23         | 19 | 0.340   | 2176.20   | -19.40  |
| 2     | Silty clay | DOC       | No cover crop | 50 cm | -0.22    | -0.60       | 0.25         | 18 | 0.360   | 1126.43   | -121.30 |
| 2     | Silty clay | DOC       | Cover crop    | 10 cm | -0.36    | -0.69       | 0.1          | 18 | 0.120   | 2527.18   | -97.32  |
| 2     | Silty clay | DOC       | Cover crop    | 30 cm | 0.03     | -0.41       | 0.45         | 19 | 0.900   | 2127.95   | 5.27    |
| 2     | Silty clay | DOC       | Cover crop    | 50 cm | -0.1     | -0.53       | 0.37         | 17 | 0.680   | 955.37    | -82.71  |
| 2     | Silty clay | DIC       | No cover crop | 10 cm | 0.51     | 0.08        | 0.79         | 17 | 0.024   | 1497.01   | 761.71  |
| 2     | Silty clay | DIC       | No cover crop | 30 cm | 0.76     | 0.48        | 0.9          | 19 | 7.2e-05 | 1653.41   | 145.73  |
| 2     | Silty clay | DIC       | No cover crop | 50 cm | 0.52     | 0.10        | 0.78         | 18 | 0.018   | 2036.25   | 290.01  |

|   |            |     |               |       |       |       |       |    |       |         |         |
|---|------------|-----|---------------|-------|-------|-------|-------|----|-------|---------|---------|
| 2 | Silty clay | DIC | Cover crop    | 10 cm | 0.54  | 0.13  | 0.79  | 18 | 0.013 | 2856.82 | 505.70  |
| 2 | Silty clay | DIC | Cover crop    | 30 cm | 0.62  | 0.26  | 0.83  | 19 | 0.003 | 2589.04 | 234.51  |
| 2 | Silty clay | DIC | Cover crop    | 50 cm | 0.24  | -0.24 | 0.63  | 17 | 0.320 | 3038.05 | 343.86  |
| 2 | Silty clay | TDC | No cover crop | 10 cm | 0.46  | 0.00  | 0.75  | 17 | 0.049 | 3306.27 | 580.01  |
| 2 | Silty clay | TDC | No cover crop | 30 cm | 0.58  | 0.20  | 0.81  | 19 | 0.006 | 3829.61 | 126.33  |
| 2 | Silty clay | TDC | No cover crop | 50 cm | 0.2   | -0.26 | 0.59  | 18 | 0.390 | 3162.69 | 168.70  |
| 2 | Silty clay | TDC | Cover crop    | 10 cm | 0.51  | 0.08  | 0.78  | 18 | 0.023 | 5384.00 | 408.38  |
| 2 | Silty clay | TDC | Cover crop    | 30 cm | 0.58  | 0.20  | 0.81  | 19 | 0.005 | 4716.98 | 239.78  |
| 2 | Silty clay | TDC | Cover crop    | 50 cm | 0.15  | -0.32 | 0.57  | 17 | 0.530 | 3993.42 | 261.16  |
| 3 | Sandy loam | DOC | No cover crop | 10 cm | -0.32 | -0.79 | 0.39  | 8  | 0.370 | 993.18  | -95.58  |
| 3 | Sandy loam | DOC | No cover crop | 30 cm | 0.52  | -0.16 | 0.87  | 8  | 0.120 | 1158.40 | 296.97  |
| 3 | Sandy loam | DOC | No cover crop | 50 cm | 0.62  | -0.01 | 0.9   | 8  | 0.054 | 1105.16 | 329.16  |
| 3 | Sandy loam | DOC | Cover crop    | 10 cm | 0.53  | -0.15 | 0.87  | 8  | 0.110 | 538.72  | 239.88  |
| 3 | Sandy loam | DOC | Cover crop    | 30 cm | -0.54 | -0.87 | 0.13  | 8  | 0.100 | 1787.84 | -39.01  |
| 3 | Sandy loam | DOC | Cover crop    | 50 cm | -0.12 | -0.70 | 0.55  | 8  | 0.750 | 2103.23 | -45.06  |
| 3 | Sandy loam | DIC | No cover crop | 10 cm | 0.18  | -0.51 | 0.73  | 8  | 0.620 | 797.38  | 344.82  |
| 3 | Sandy loam | DIC | No cover crop | 30 cm | 0.64  | 0.03  | 0.91  | 8  | 0.044 | 409.41  | 985.31  |
| 3 | Sandy loam | DIC | No cover crop | 50 cm | 0.19  | -0.50 | 0.73  | 8  | 0.600 | 719.20  | 107.68  |
| 3 | Sandy loam | DIC | Cover crop    | 10 cm | -0.27 | -0.77 | 0.43  | 8  | 0.440 | 2370.44 | -591.41 |
| 3 | Sandy loam | DIC | Cover crop    | 30 cm | 0.71  | 0.14  | 0.92  | 8  | 0.022 | 1275.25 | 206.88  |
| 3 | Sandy loam | DIC | Cover crop    | 50 cm | 0.19  | -0.50 | 0.73  | 8  | 0.600 | 990.55  | 117.39  |
| 3 | Sandy loam | TDC | No cover crop | 10 cm | 0.12  | -0.55 | 0.7   | 8  | 0.740 | 1790.56 | 249.24  |
| 3 | Sandy loam | TDC | No cover crop | 30 cm | 0.62  | -0.01 | 0.9   | 8  | 0.055 | 1567.82 | 1282.28 |
| 3 | Sandy loam | TDC | No cover crop | 50 cm | 0.7   | 0.13  | 0.92  | 8  | 0.024 | 1824.36 | 436.84  |
| 3 | Sandy loam | TDC | Cover crop    | 10 cm | -0.2  | -0.74 | 0.49  | 8  | 0.580 | 2909.16 | -351.53 |
| 3 | Sandy loam | TDC | Cover crop    | 30 cm | 0.7   | 0.12  | 0.92  | 8  | 0.025 | 3063.09 | 167.87  |
| 3 | Sandy loam | TDC | Cover crop    | 50 cm | 0.14  | -0.54 | 0.71  | 8  | 0.710 | 3093.78 | 72.32   |
| 3 | Silty clay | DOC | No cover crop | 10 cm | 0.34  | -0.37 | 0.8   | 8  | 0.340 | 1571.01 | 34.52   |
| 3 | Silty clay | DOC | No cover crop | 30 cm | -0.29 | -0.78 | 0.41  | 8  | 0.410 | 2090.26 | -198.08 |
| 3 | Silty clay | DOC | No cover crop | 50 cm | 0.29  | -0.42 | 0.78  | 8  | 0.420 | 863.41  | 156.76  |
| 3 | Silty clay | DOC | Cover crop    | 10 cm | -0.86 | -0.97 | -0.51 | 8  | 0.001 | 2679.75 | -263.30 |
| 3 | Silty clay | DOC | Cover crop    | 30 cm | -0.57 | -0.88 | 0.09  | 8  | 0.085 | 2453.20 | -148.93 |

|   |            |     |               |       |      |       |      |   |       |         |         |
|---|------------|-----|---------------|-------|------|-------|------|---|-------|---------|---------|
| 3 | Silty clay | DOC | Cover crop    | 50 cm | 0.02 | -0.65 | 0.68 | 7 | 0.950 | 1222.70 | 42.08   |
| 3 | Silty clay | DIC | No cover crop | 10 cm | 0.59 | -0.06 | 0.89 | 8 | 0.070 | 2267.58 | 472.91  |
| 3 | Silty clay | DIC | No cover crop | 30 cm | 0.26 | -0.44 | 0.76 | 8 | 0.470 | 1567.35 | 316.61  |
| 3 | Silty clay | DIC | No cover crop | 50 cm | 0.48 | -0.22 | 0.85 | 8 | 0.160 | 1483.31 | 627.02  |
| 3 | Silty clay | DIC | Cover crop    | 10 cm | 0.75 | 0.22  | 0.94 | 8 | 0.013 | 2969.80 | 906.09  |
| 3 | Silty clay | DIC | Cover crop    | 30 cm | 0.88 | 0.56  | 0.97 | 8 | 0.001 | 1587.92 | 783.19  |
| 3 | Silty clay | DIC | Cover crop    | 50 cm | 0.53 | -0.21 | 0.88 | 7 | 0.150 | 2130.53 | 1289.82 |
| 3 | Silty clay | TDC | No cover crop | 10 cm | 0.62 | -0.01 | 0.9  | 8 | 0.055 | 3838.59 | 507.43  |
| 3 | Silty clay | TDC | No cover crop | 30 cm | 0.09 | -0.57 | 0.68 | 8 | 0.810 | 3657.61 | 118.53  |
| 3 | Silty clay | TDC | No cover crop | 50 cm | 0.44 | -0.26 | 0.84 | 8 | 0.200 | 2346.72 | 783.78  |
| 3 | Silty clay | TDC | Cover crop    | 10 cm | 0.63 | 0.00  | 0.9  | 8 | 0.051 | 5649.55 | 642.79  |
| 3 | Silty clay | TDC | Cover crop    | 30 cm | 0.83 | 0.42  | 0.96 | 8 | 0.003 | 4041.12 | 634.26  |
| 3 | Silty clay | TDC | Cover crop    | 50 cm | 0.38 | -0.38 | 0.83 | 7 | 0.310 | 3353.23 | 1331.90 |

## Supplementary figures

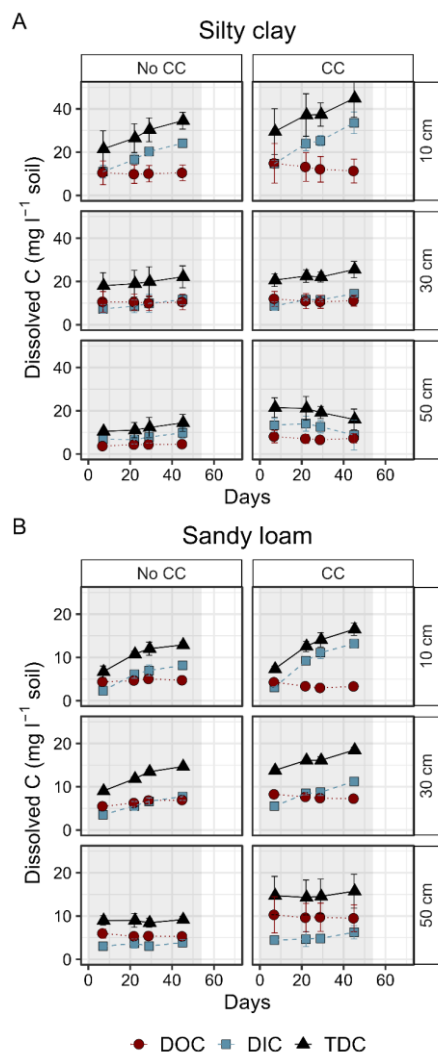

**Figure S1.** Timeseries of dissolved organic carbon (DOC), inorganic carbon (DIC) and total dissolved carbon (TDC) as  $\text{mg C l}^{-1}$  soil (mean $\pm$ sd,  $n=1-3$ ) during (shaded area) waterlogging in silty clay (A) and sandy loam (B) soil profiles with and without cover crops (No CC = No cover crops, CC = Cover crops) in cycle three. Days on the x-axis represent the days since the beginning of excess irrigation/waterlogging. Note the differing scales on y-axis in the two soils.

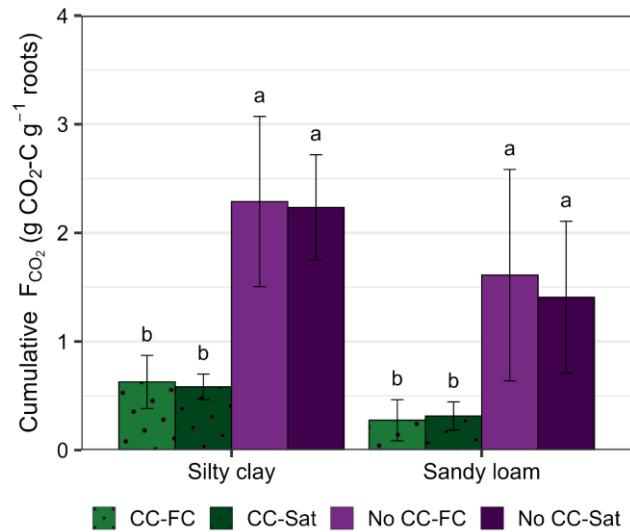

**Figure S2.** Off-season (beginning of the water treatment until the last  $CO_2$  measurement day, 67 days) cumulative  $CO_2$  efflux per g dry roots (mean $\pm$ sd, n=4) in the top 20 cm soil layer. The g roots  $g^{-1}$  soil was multiplied with soil bulk density and the depth (20 cm) of the soil layer. For a description of the root washing methodology, the reader is referred to the publication by Kronberg et al. (2024). The letters indicate the statistical differences between the means within each soil type.

## References

Kronberg, R., Kanerva, S., Koskinen, M., Polvinen, T., Heinonsalo, J., Pihlatie, M., 2024. Controlled soil monolith experiment for studying the effects of waterlogging on redox processes. *Geoderma* 452, 117110. <https://doi.org/10.1016/j.geoderma.2024.117110>
